# Supplementary material for: Using one spin-transition to trigger another in solid solutions of two different spin-crossover complexes
Source: Royal Society of Chemistry journal article supplement (doi:10.1039/c0cc00603c), 2010-01-01
Supplement: c0cc00603c.pdf [file c0cc00603c.pdf]

# Using One Spin-Transition to Trigger Another in Solid Solutions of Two Different Spin-Crossover Complexes

Malcolm A. Halcrow\*

*School of Chemistry, University of Leeds, Woodhouse Lane, Leeds, UK LS2 9JT.  
E-mail: m.a.halcrow@leeds.ac.uk*

## Electronic Supplementary Information

**Figure S1** Partial packing diagrams of  $[\text{Fe}(\text{bpp})_2][\text{BF}_4]_2$  and  $[\text{Co}(\text{terpy})_2][\text{BF}_4]_2$ , showing the “terpyridine embrace” lattice.

**Table S1** Elemental microanalyses of the solid solution materials and their pure precursor compounds.

**Table S2** Experimental details for the single crystal structure determination of  $[\text{Ru}(\text{bpp})_2][\text{BF}_4]_2$

**Table S3** Selected bond lengths and angles in the crystal structure of  $[\text{Ru}(\text{bpp})_2][\text{BF}_4]_2$ .

**Figure S2** View of the complex dication in  $[\text{Ru}(\text{bpp})_2][\text{BF}_4]_2$ .

**Figure S3** Selected powder X-ray diffraction data from the compounds in this work.

**Table S4** Assignment of the ES mass spectra from  $[\text{M}(\text{bpp})_2][\text{BF}_4]_2$  ( $\text{M} = \text{Fe}$  and  $\text{Ru}$ ),  $[\text{Co}(\text{terpy})_2][\text{BF}_4]_2$  and the solid solutions.

**Figure S4** Electrospray mass spectra of **1b** and **2b**.

**Figure S5**  $^1\text{H}$  NMR spectra of **1b** and **2b**.

**Table S5** Predicted and observed values of  $\chi_{\text{M}}T$  ( $\text{cm}^3 \text{mol}^{-1} \text{K}$ ) from high- and low-spin **1a-1c** and **2a-2c**, based on the analytical compositions of the samples.

**Figure S6** Experimental and simulated X-band EPR spectrum of **1a** at 113 K.

**Figure S7** Low temperature X-band powder EPR spectra of the solid solutions in this work.

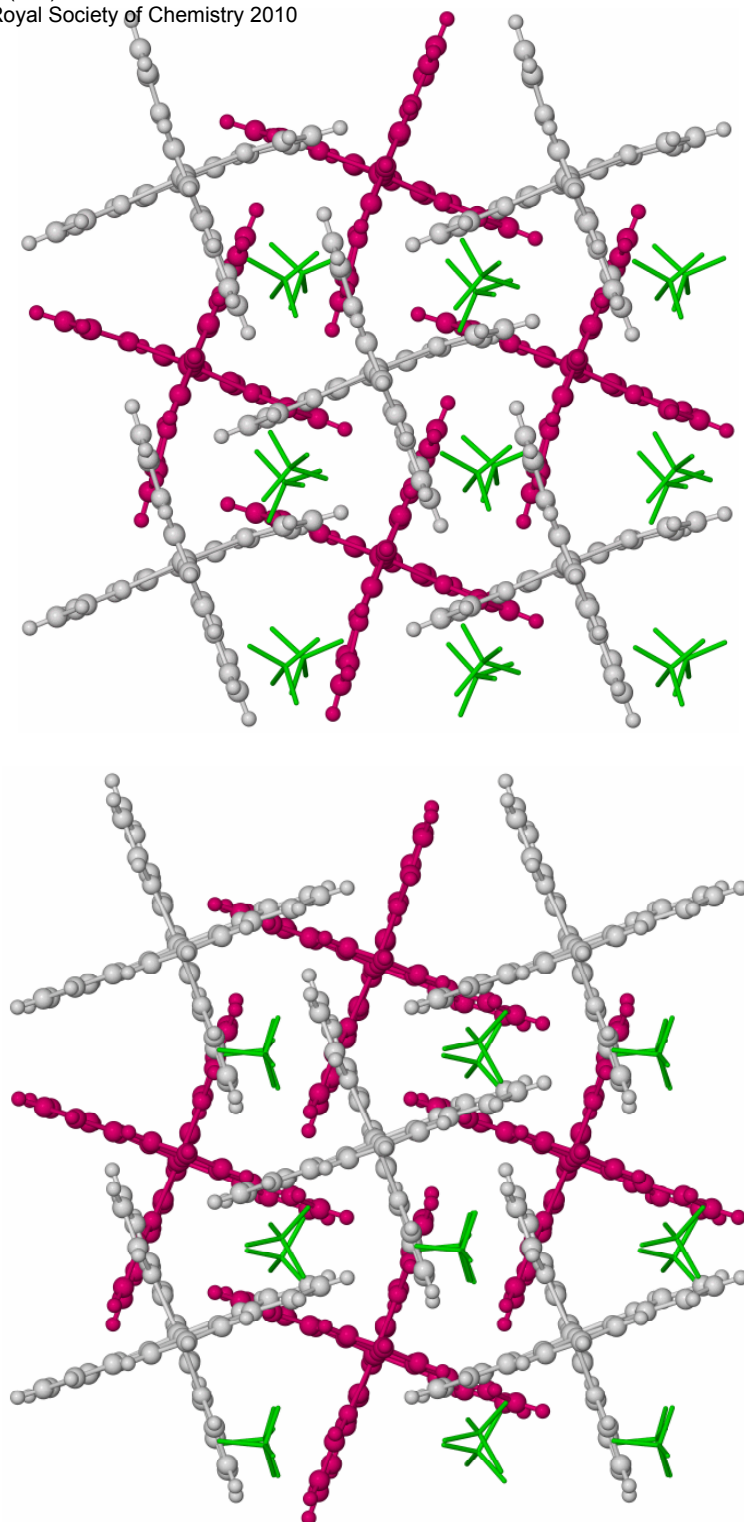

**Fig. S1** Partial packing diagrams of  $[\text{Fe}(\text{bpp})_2][\text{BF}_4]_2$  (top)<sup>11,12</sup> and  $[\text{Co}(\text{terpy})_2][\text{BF}_4]_2$  (bottom)<sup>13</sup> at 300 K, showing the “terpyridine embrace” lattice. The reference numbers are the same as those used in the main paper.

Both views are parallel to the [001] crystallographic vector, with [110] ( $[\text{Fe}(\text{bpp})_2][\text{BF}_4]_2$ ) or [100] ( $[\text{Co}(\text{terpy})_2][\text{BF}_4]_2$ ) running horizontally. The complex dications in both structures associate into alternating four-fold layers, coloured white and pink. Only one orientation of the disordered  $\text{BF}_4^-$  ions is shown, which are de-emphasised and coloured green.

**Table S1** Elemental microanalyses of the solid solution materials [Fe(bpp)<sub>2</sub>]<sub>z</sub>[Co(terpy)<sub>2</sub>]<sub>1-z</sub>[BF<sub>4</sub>]<sub>2</sub> (**1a-1c**), [Ru(bpp)<sub>2</sub>]<sub>z</sub>[Co(terpy)<sub>2</sub>]<sub>1-z</sub>[BF<sub>4</sub>]<sub>2</sub> (**2a-2c**) and their pure precursor compounds [found, % (calcd, %)]. The estimated error on z, based on these data, is ±0.01.

|                                                          | z    | C           | H           | N           | Fe        | Co        |
|----------------------------------------------------------|------|-------------|-------------|-------------|-----------|-----------|
| [Fe(bpp) <sub>2</sub> ][BF <sub>4</sub> ] <sub>2</sub>   | –    | 40.3 (40.5) | 2.75 (2.78) | 21.5 (21.5) | 8.3 (8.6) | –         |
| [Co(terpy) <sub>2</sub> ][BF <sub>4</sub> ] <sub>2</sub> | –    | 51.5 (51.5) | 3.10 (3.17) | 12.0 (12.0) | –         | 8.2 (8.4) |
| [Ru(bpp) <sub>2</sub> ][BF <sub>4</sub> ] <sub>2</sub>   | –    | 37.9 (37.9) | 2.55 (2.60) | 20.2 (20.1) | –         | –         |
| <b>1a</b>                                                | 0.97 | 41.0 (40.9) | 2.70 (2.79) | 21.3 (21.2) | 8.4 (8.3) | 0.3 (0.3) |
| <b>1b</b>                                                | 0.85 | 42.4 (42.3) | 2.75 (2.84) | 20.1 (20.0) | 7.3 (7.2) | 1.2 (1.3) |
| <b>1c</b>                                                | 0.76 | 43.3 (43.3) | 2.80 (2.88) | 19.2 (19.1) | 6.3 (6.4) | 1.9 (2.1) |
| <b>2a</b>                                                | 0.97 | 38.3 (38.3) | 2.55 (2.62) | 19.9 (19.8) | –         | 0.3 (0.3) |
| <b>2b</b>                                                | 0.85 | 39.9 (40.0) | 2.65 (2.69) | 19.0 (18.9) | –         | 1.2 (1.3) |
| <b>2c</b>                                                | 0.77 | 41.1 (41.0) | 2.70 (2.73) | 18.2 (18.2) | –         | 1.8 (1.9) |

### Single crystal structure of [Ru(bpp)<sub>2</sub>][BF<sub>4</sub>]<sub>2</sub>

Single crystals of this compound were obtained by diffusion of diethyl ether vapour into a nitromethane solution of the complex. Experimental details for the structure determination are given in Table S2. One of the two BF<sub>4</sub><sup>–</sup> anions is disordered over two sites, with a 0.7:0.3 occupancy ratio. The refined restraints B–F = 1.40(2) and F...F = 2.29(2) Å were applied to these disordered residues. All non-H atoms except for the minor anion disorder site were refined anisotropically, and H atoms were placed in calculated positions and refined using a riding model. CCDC 771524.

**Table S2** Experimental details for the single crystal structure determination of [Ru(bpp)<sub>2</sub>][BF<sub>4</sub>]<sub>2</sub>

|                     |                                                                                  |                                            |          |
|---------------------|----------------------------------------------------------------------------------|--------------------------------------------|----------|
| Molecular formula   | C <sub>22</sub> H <sub>18</sub> B <sub>2</sub> F <sub>8</sub> N <sub>10</sub> Ru | μ (Mo-K <sub>α</sub> ) (mm <sup>–1</sup> ) | 0.661    |
| M <sub>r</sub>      | 697.15                                                                           | T (K)                                      | 150(2)   |
| Crystal class       | Monoclinic                                                                       | Measured reflections                       | 22696    |
| Space group         | P2 <sub>1</sub>                                                                  | Independent reflections                    | 6364     |
| a (Å)               | 8.5703(8)                                                                        | R <sub>int</sub>                           | 0.062    |
| b (Å)               | 8.6188(7)                                                                        | R(F) <sup>a</sup>                          | 0.034    |
| c (Å)               | 18.6937(16)                                                                      | wR(F <sup>2</sup> ) <sup>b</sup>           | 0.075    |
| β (°)               | 97.706(6)                                                                        | Goodness of fit                            | 1.037    |
| V (Å <sup>3</sup> ) | 1368.4(2)                                                                        | Flack parameter                            | –0.02(2) |
| Z                   | 2                                                                                |                                            |          |

$$^a R = \sum [ |F_o| - |F_c| ] / \sum |F_o| \quad ^b wR = [ \sum w(F_o^2 - F_c^2) / \sum wF_o^4 ]^{1/2}$$

**Table S3** Selected bond lengths and angles in the crystal structure of  $[\text{Ru}(\text{bpp})_2][\text{BF}_4]_2$  ( $\text{\AA}$ ,  $^\circ$ ).

|                  |            |                   |            |
|------------------|------------|-------------------|------------|
| Ru(1)–N(2)       | 2.023(2)   | Ru(1)–N(18)       | 2.022(3)   |
| Ru(1)–N(9)       | 2.103(3)   | Ru(1)–N(25)       | 2.095(3)   |
| Ru(1)–N(14)      | 2.081(3)   | Ru(1)–N(30)       | 2.079(3)   |
|                  |            |                   |            |
| N(2)–Ru(1)–N(9)  | 78.41(11)  | N(9)–Ru(1)–N(30)  | 92.54(11)  |
| N(2)–Ru(1)–N(14) | 78.35(11)  | N(14)–Ru(1)–N(18) | 101.06(11) |
| N(2)–Ru(1)–N(18) | 178.26(19) | N(14)–Ru(1)–N(25) | 92.16(12)  |
| N(2)–Ru(1)–N(25) | 103.82(14) | N(14)–Ru(1)–N(30) | 90.29(12)  |
| N(2)–Ru(1)–N(30) | 99.83(13)  | N(18)–Ru(1)–N(25) | 77.82(13)  |
| N(9)–Ru(1)–N(14) | 156.73(10) | N(18)–Ru(1)–N(30) | 78.51(13)  |
| N(9)–Ru(1)–N(18) | 102.13(11) | N(25)–Ru(1)–N(30) | 156.23(10) |
| N(9)–Ru(1)–N(25) | 94.46(11)  |                   |            |

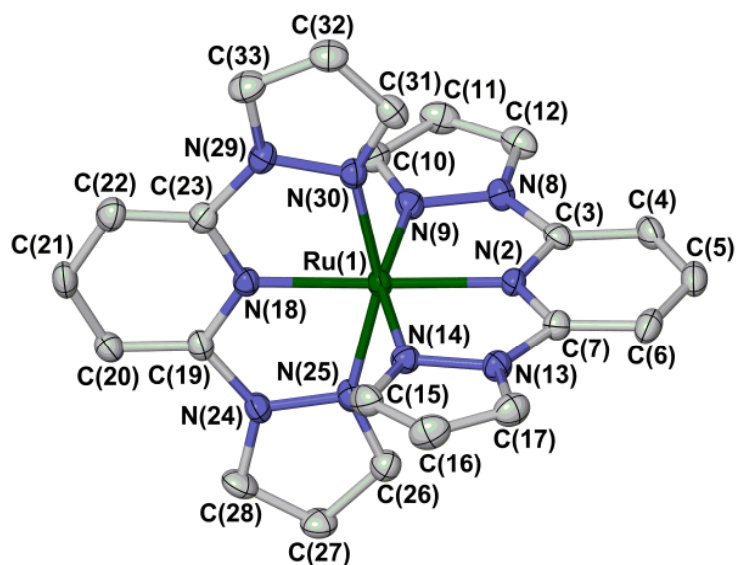

**Fig. S2** View of the complex dication in  $[\text{Ru}(\text{bpp})_2][\text{BF}_4]_2$ , showing the atom numbering scheme employed. All H atoms have been omitted for clarity, and thermal ellipsoids are at the 50% probability level.

$[\text{Ru}(\text{bpp})_2][\text{BF}_4]_2$  is isostructural with  $[\text{Fe}(\text{bpp})_2][\text{BF}_4]_2$ , and its crystal packing diagram is visually indistinguishable from those in Fig. S1.

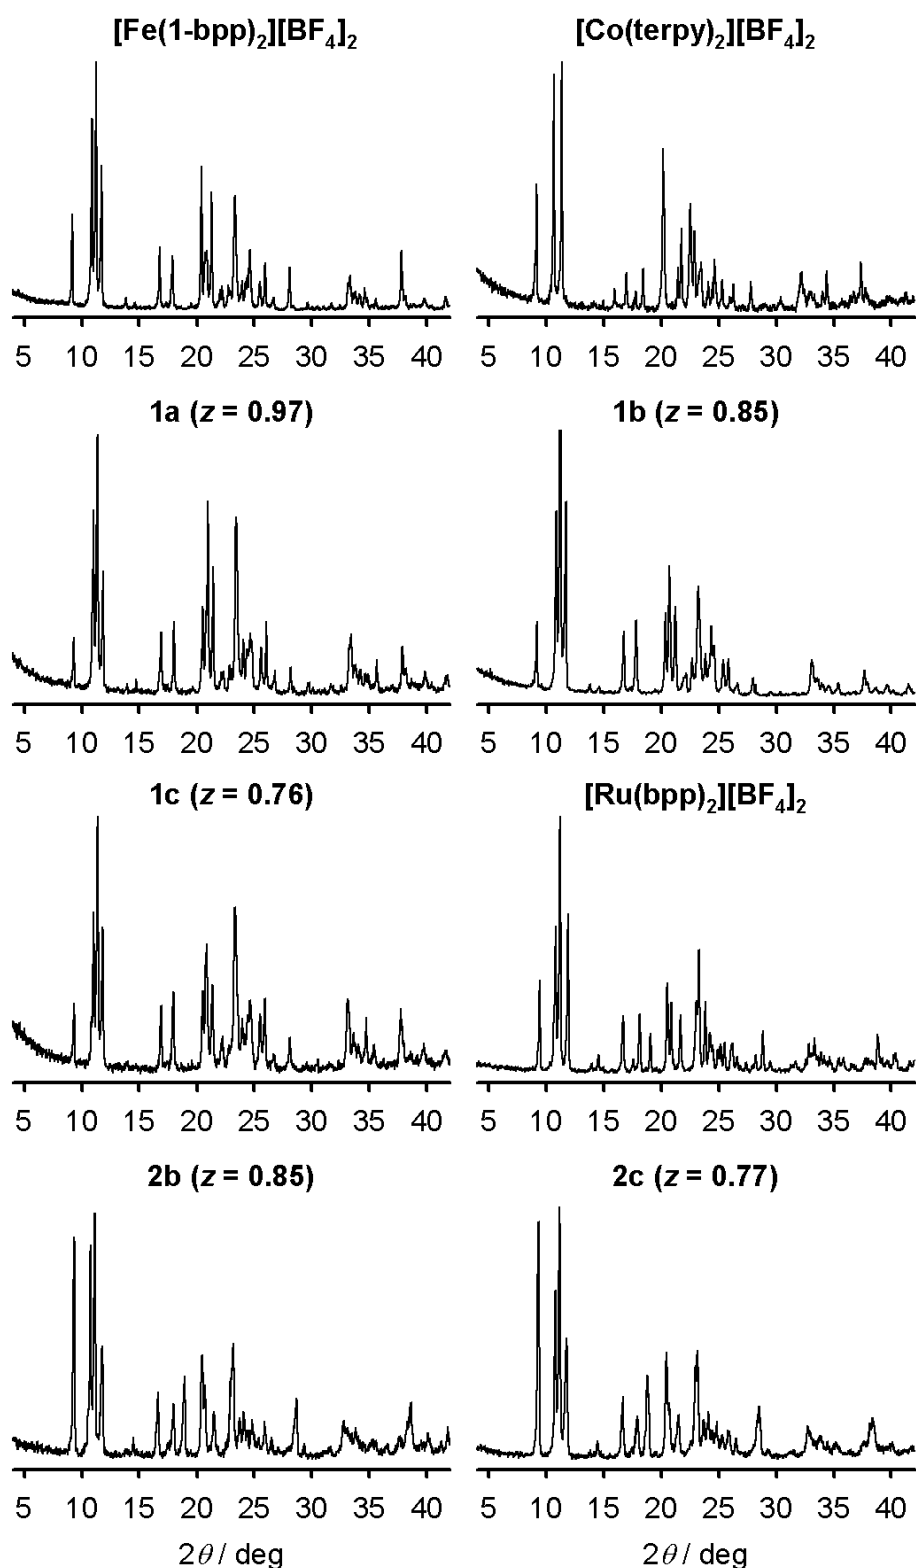

**Fig. S3** Selected powder X-ray diffraction data from the compounds in this work at 298 K ( $\lambda = 1.5418 \text{ \AA}$ ).

**Table S4** Assignment of the electrospray (ES) mass spectra from  $[M(\text{bpp})_2][\text{BF}_4]_2$  ( $M = \text{Fe}$  and  $\text{Ru}$ ),  $[\text{Co}(\text{terpy})_2][\text{BF}_4]_2$  and the solid solutions (Figure S4, next page). All peaks show correct isotopic distributions for their assigned molecular ions. Molecular ions of sodium- or formate-containing species arise from the sodium formate present in the ES carrier solution.

| $m/z$                                                 | Intensity (%) <sup>a</sup> | Assignment                                                    |
|-------------------------------------------------------|----------------------------|---------------------------------------------------------------|
| $[\text{Fe}(\text{bpp})_2][\text{BF}_4]_2$            |                            |                                                               |
| 565.1                                                 | 11                         | $[\text{}^{56}\text{Fe}(\text{bpp})_2(^{11}\text{BF}_4)]^+$   |
| 497.1                                                 | 43                         | $[\text{}^{56}\text{Fe}(\text{bpp})_2\text{F}]^+$             |
| 445.2                                                 | 5                          | $[\text{}^{23}\text{Na}(\text{bpp})_2]^+$                     |
| 312.0                                                 | 40                         | $[\text{}^{56}\text{Fe}(\text{bpp})(\text{O}_2\text{CH})]^+$  |
| 286.0                                                 | 25                         | $[\text{}^{56}\text{Fe}(\text{bpp})\text{F}]^+$               |
| 239.1                                                 | 35                         | $[\text{}^{56}\text{Fe}(\text{bpp})_2]^{2+}$                  |
| 234.1                                                 | 100                        | $[\text{}^{23}\text{Na}(\text{bpp})]^+$                       |
| 212.1                                                 | 90                         | $[\text{Hbpp}]^+$                                             |
| $[\text{Ru}(\text{bpp})_2][\text{BF}_4]_2$            |                            |                                                               |
| 611.1                                                 | 13                         | $[\text{}^{102}\text{Ru}(\text{bpp})_2(^{11}\text{BF}_4)]^+$  |
| 262.0                                                 | 100                        | $[\text{}^{102}\text{Ru}(\text{bpp})_2]^{2+}$                 |
| $[\text{Co}(\text{terpy})_2][\text{BF}_4]_2$          |                            |                                                               |
| 612.1                                                 | 44                         | $[\text{}^{59}\text{Co}(\text{terpy})_2(^{11}\text{BF}_4)]^+$ |
| 544.1                                                 | 16                         | $[\text{}^{59}\text{Co}(\text{terpy})_2\text{F}]^+$           |
| 311.0                                                 | 9                          | $[\text{}^{59}\text{Co}(\text{terpy})\text{F}]^+$             |
| 262.6                                                 | 100                        | $[\text{}^{59}\text{Co}(\text{terpy})_2]^{2+}$                |
| Additional peaks seen in <b>1b</b> and <b>1c</b> only |                            |                                                               |
| 251.6                                                 | 3-5 <sup>b</sup>           | $[\text{}^{59}\text{Co}(\text{bpp})(\text{terpy})]^{2+}$      |
| 250.1                                                 | 3-4 <sup>b</sup>           | $[\text{}^{56}\text{Fe}(\text{bpp})(\text{terpy})]^{2+}$      |

<sup>a</sup>Intensities in the spectra of the pure complexes. The relative intensities of the same peaks in the spectra of **1a-1c** closely mirror those seen for the pure compounds (Fig. S4). <sup>b</sup>Intensity relative to the parent ion for  $[\text{}^{59}\text{Co}(\text{terpy})_2]^{2+}$  at  $m/z = 262.6$ .

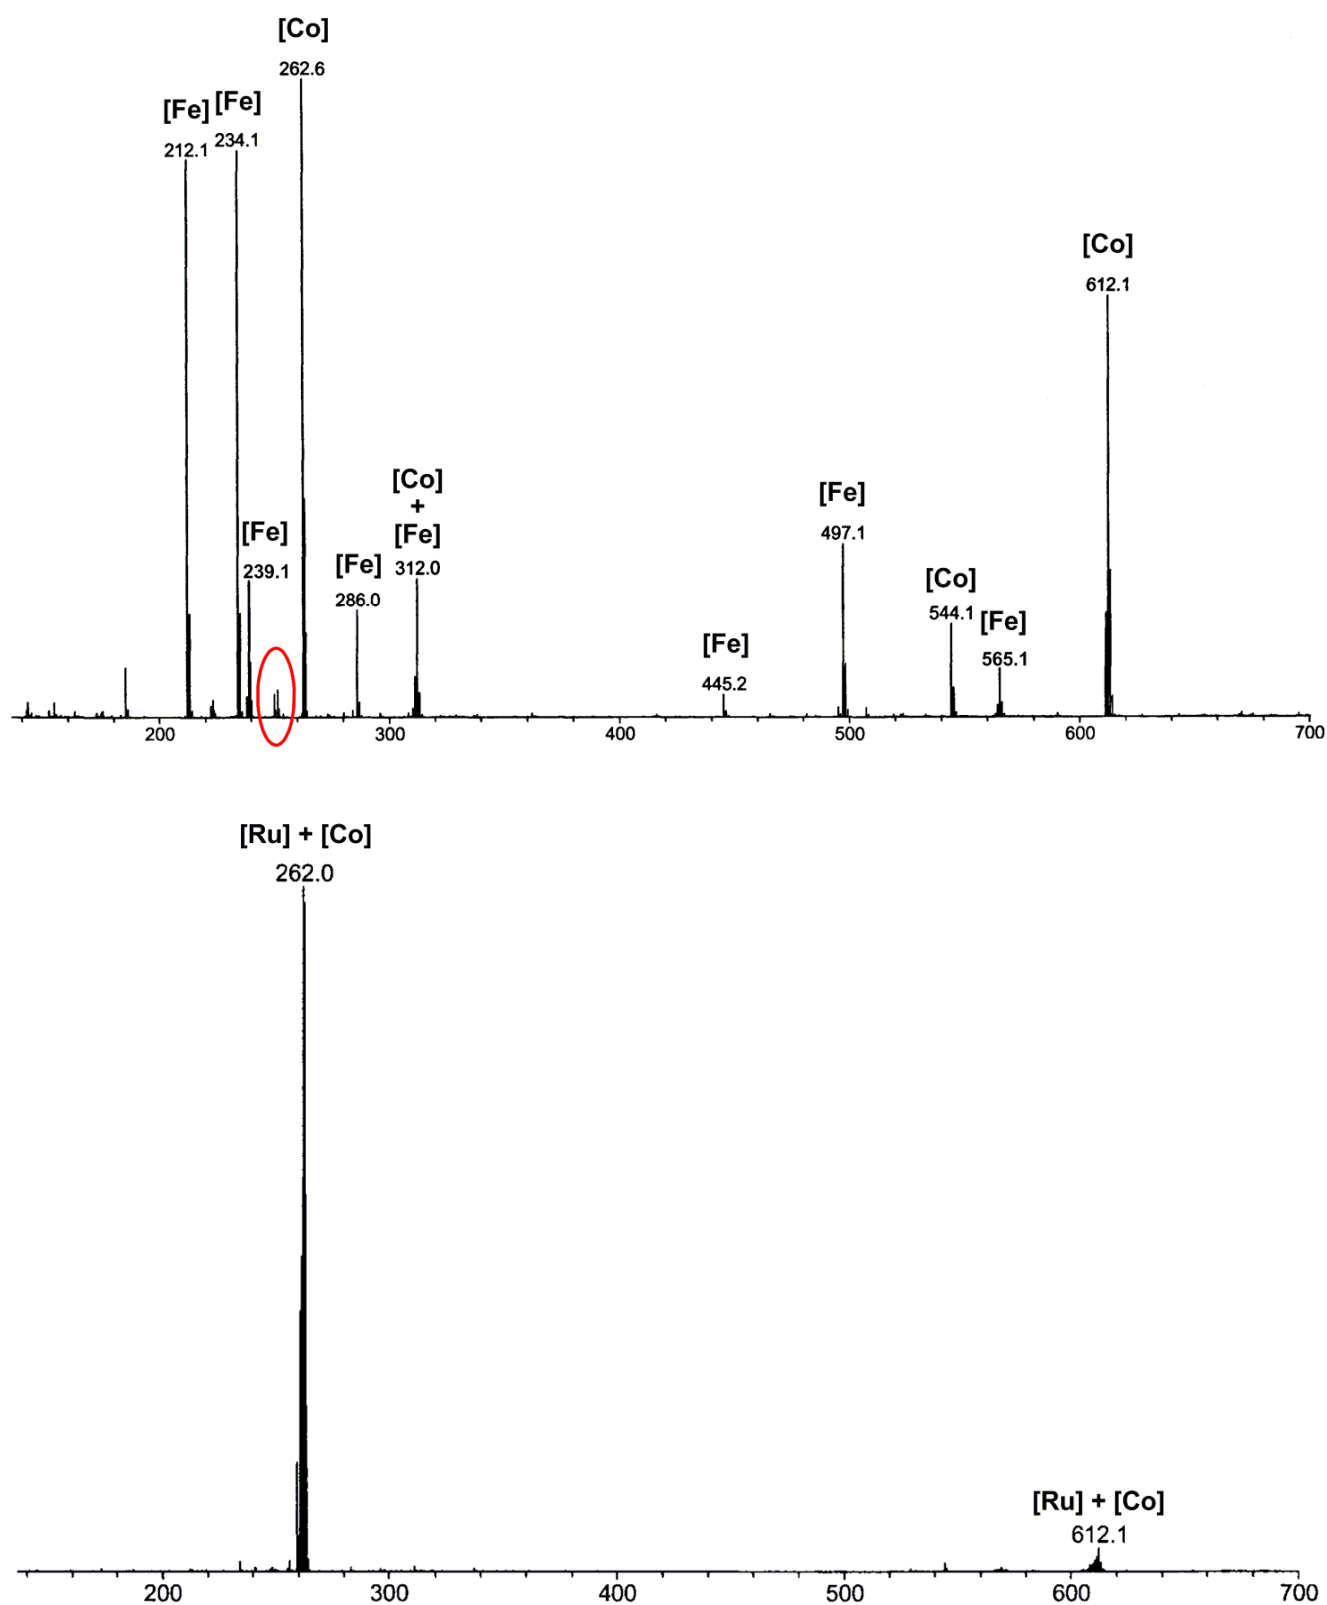

**Fig. S4** Electrospray mass spectra of **1b** (top) and **2b** (bottom) from MeCN solution. Peaks are labeled according to whether they are also found in the spectra of pure  $[\text{Fe}(\text{bpp})_2][\text{BF}_4]_2$  ([Fe]),  $[\text{Ru}(\text{bpp})_2][\text{BF}_4]_2$  ([Ru]) or  $[\text{Co}(\text{terpy})_2][\text{BF}_4]_2$  ([Co]; Table S4).

The circled peaks in the spectrum of **1b** are assigned to the mixed-ligand species  $[\text{M}(\text{bpp})(\text{terpy})]^{2+}$  ( $\text{M} = {}^{56}\text{Fe}$ ,  $m/z = 250.1$  and  $\text{M} = {}^{59}\text{Co}$ ,  $m/z = 251.6$ ). No peaks from  $[\text{M}(\text{bpp})(\text{terpy})]^{2+}$  ( $\text{M} = {}^{102}\text{Ru}$ ,  $m/z = 273.1$  and  $\text{M} = {}^{59}\text{Co}$ ,  $m/z = 251.6$ ) are observed in the spectrum of **2b**.

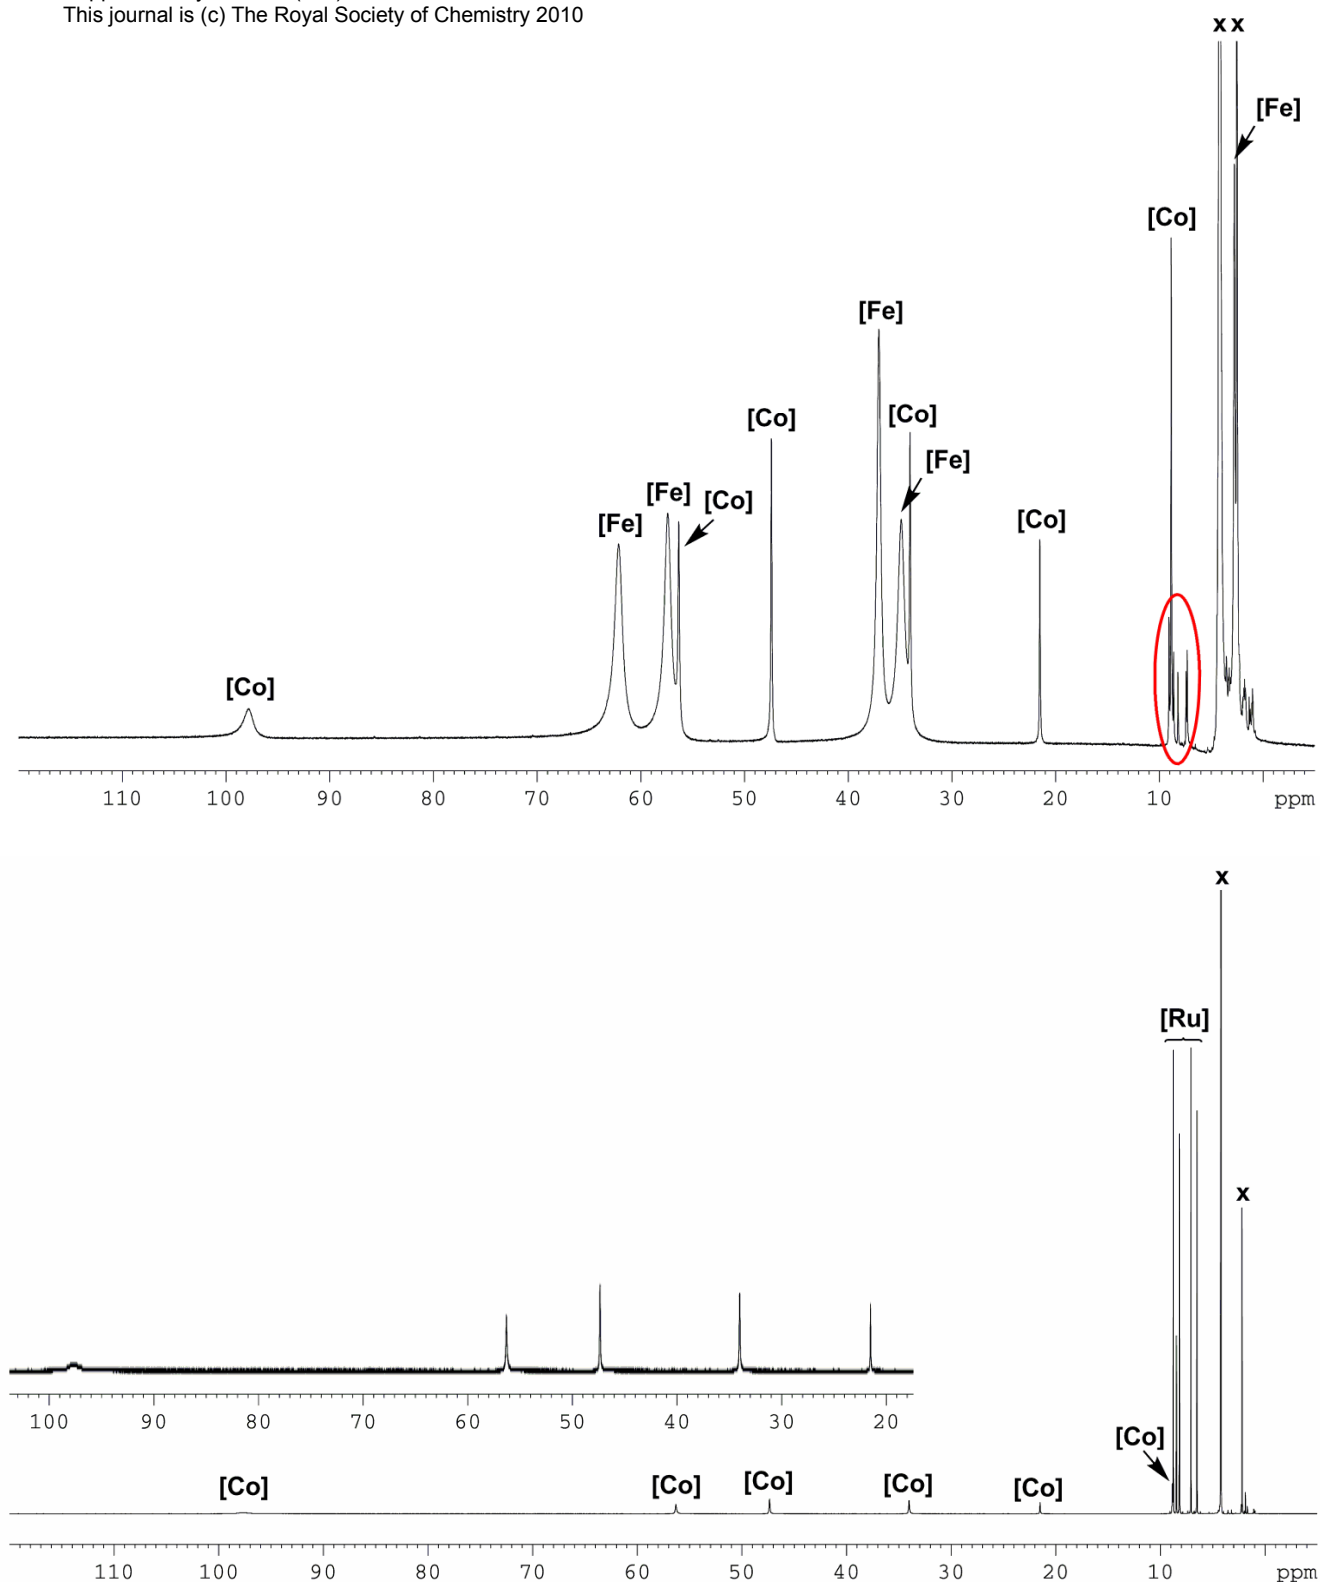

**Fig. S5** <sup>1</sup>H NMR spectra of **1b** (top) and **2b** (bottom) at 298 K (CD<sub>3</sub>NO<sub>2</sub>, 300.1 MHz). Peaks are labeled according to whether they are also found in the spectra of pure [Fe(bpp)<sub>2</sub>][BF<sub>4</sub>]<sub>2</sub> ([Fe]), [Ru(bpp)<sub>2</sub>][BF<sub>4</sub>]<sub>2</sub> ([Ru]) or [Co(terpy)<sub>2</sub>][BF<sub>4</sub>]<sub>2</sub> ([Co]).

The circled peaks in the spectrum of **1b** correspond to a diamagnetic terpy-containing contaminant, that is not present in solutions of [Co(terpy)<sub>2</sub>][BF<sub>4</sub>]<sub>2</sub>. The contaminant peaks are also not observed in freshly prepared mixtures of [Fe(bpp)<sub>2</sub>][BF<sub>4</sub>]<sub>2</sub> and [Co(terpy)<sub>2</sub>][BF<sub>4</sub>]<sub>2</sub>, but grow in slowly over a period of hours.

Possible assignments of the contaminant include [Fe(terpy)<sub>2</sub>]<sup>2+</sup> or, more likely, [Co(terpy)<sub>2</sub>]<sup>3+</sup>. It cannot be assigned as either of the mixed-ligand complexes [M(bpp)(terpy)]<sup>2+</sup> (M = Fe or Co), though (*c.f.* Fig. S4).

The peaks from [Ru(bpp)<sub>2</sub>][BF<sub>4</sub>]<sub>2</sub> are much more intense than those of [Co(terpy)<sub>2</sub>][BF<sub>4</sub>]<sub>2</sub> in the spectrum of **1b** because of the diamagnetism of the ruthenium compound.



**Table S5** Predicted and observed values of  $\chi_M T$  ( $\text{cm}^3 \text{mol}^{-1} \text{K}$ ) from high- and low-spin  $[\text{Fe}(\text{bpp})_2]_z[\text{Co}(\text{terpy})_2]_{1-z}[\text{BF}_4]_2$  (**1a-1c**) and  $[\text{Ru}(\text{bpp})_2]_z[\text{Co}(\text{terpy})_2]_{1-z}[\text{BF}_4]_2$  (**2a-2c**), based on the analytical compositions of the samples.

|           | $z$  | Low-spin iron +        |  | High-spin iron +        |       | Observed $\chi_M T$ at: |       |       |
|-----------|------|------------------------|--|-------------------------|-------|-------------------------|-------|-------|
|           |      | low-spin cobalt (calc) |  | high-spin cobalt (calc) |       | 5 K                     | 100 K | 400 K |
| <b>1a</b> | 0.97 | 0.012                  |  | 3.46                    | 0.015 | 0.020                   | 3.41  |       |
| <b>1b</b> | 0.85 | 0.060                  |  | 3.32                    | 0.057 | 0.077                   | 3.26  |       |
| <b>1c</b> | 0.76 | 0.10                   |  | 3.21                    | 0.10  | 0.12                    | 3.15  |       |

  

|           | $z$  | Low-spin ruthenium +   |  | Low-spin ruthenium +    |       | Observed $\chi_M T$ at: |       |       |
|-----------|------|------------------------|--|-------------------------|-------|-------------------------|-------|-------|
|           |      | low-spin cobalt (calc) |  | high-spin cobalt (calc) |       | 5 K                     | 100 K | 400 K |
| <b>2a</b> | 0.97 | 0.012                  |  | 0.069                   | 0.015 | 0.017                   | 0.064 |       |
| <b>2b</b> | 0.85 | 0.060                  |  | 0.35                    | 0.084 | 0.11                    | 0.33  |       |
| <b>2c</b> | 0.77 | 0.092                  |  | 0.53                    | 0.13  | 0.19                    | 0.53  |       |

The calculations use the following  $\chi_M T$  values for the pure components of the solid solutions; high-spin  $[\text{Fe}(\text{bpp})_2][\text{BF}_4]_2$ , = 3.5; low-spin  $[\text{Fe}(\text{bpp})_2][\text{BF}_4]_2$ , 0; high-spin  $[\text{Co}(\text{terpy})_2][\text{BF}_4]_2$ , 2.3; low-spin  $[\text{Co}(\text{bpp})_2][\text{BF}_4]_2$ , 0.4;  $[\text{Ru}(\text{bpp})_2][\text{BF}_4]_2$ , 0.

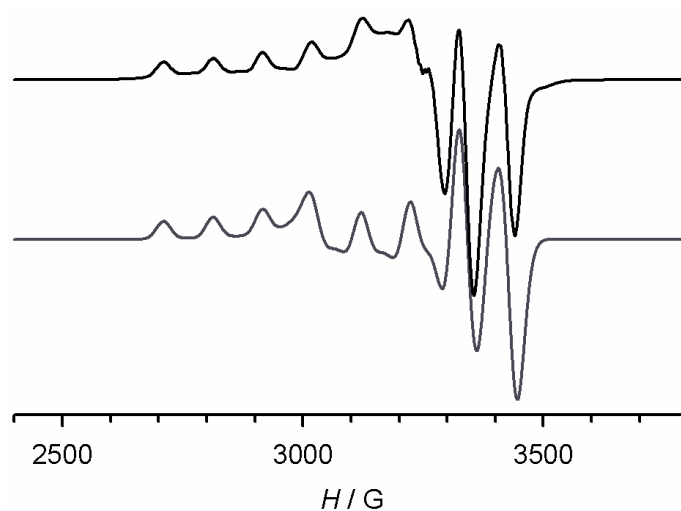

**Fig. S6** Experimental (top) and simulated (bottom) X-band EPR spectrum of solid **1a** at 113 K ( $\nu = 9.54$  GHz). See the main text for the simulation parameters. Other EPR data are shown in Fig. S7, and in Fig. 2 of the main paper.

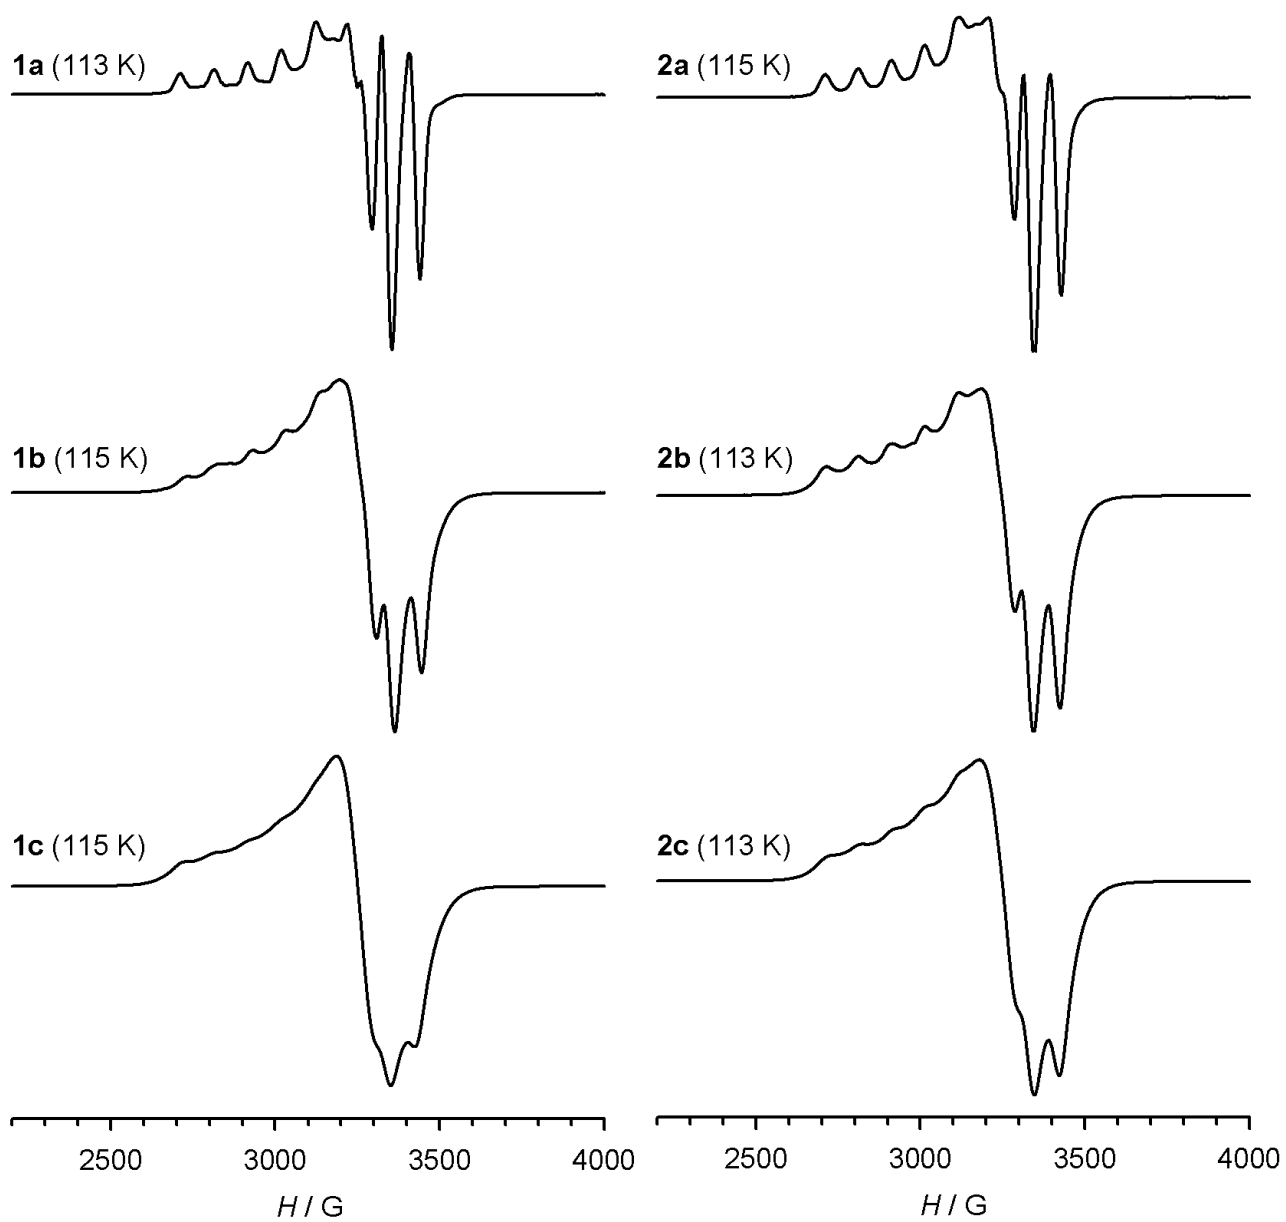

**Fig. S7** Low temperature X-band powder EPR spectra of the solid solutions in this work as powder samples ( $\nu = 9.54$  GHz). A simulation of the spectrum of **1a** is shown in Fig. S6.
